# Supplementary material
Source: publisher figshare collection journal article supplement (https://frontiersin.figshare.com/ndownloader/files/22907291)
Supplement: Supplementary file 1 [file 22907291]

Table S3: Species composition and abbreviation in five 1 ha (100 m �� 100 m) plots at the Baotianman National Nature Reserve.
Species	Abbreviation
Abelia dielsii	ABD
Abelia macrotera	ABM
Acer caudatum	ACC
Acer davidi	ACD
Acer grosseri	ACG
Acer henryi	ACH
Acer palmatum	ACP
Acer robustum	ACR
Acanthopanax senticosus	ACS
Acer tegmentosum	ACT
Acer griseum	AG
Ailanthus altissima	AIA
Albizia henryi	ALH
Albizia kalkora	ALK
Acer Pictum	AP
Aralia chinensis	ARC
Armeniaca sibirica	ARS
Berberis circumserrata	BEC
Betula japonica	BEJ
Betula luminifera	BLU
Bothrocaryum controversum	BOC
Buckleya graebneriana	BUG
Buckleya henryi	BUH
Carpinus cordata	CAC
Carya cathayensis	CACA
Carpinus henryana	CAH
Carpinus hupeana	CAHU
Campylotropis macrocarpa	CAM
Castanea sequinii	CAS
Carpinus turczaninowii	CAT
Cercis chinensis	CCFP
Cerasus conradinae	CEC
Cerasus clarofolia	CECL
Celtis koraiensis	CEK
Cerasus polytricha	CEP
Cephalotaxus sinensis	CES
Cerasus scopulorum	CESC
Cerasus serrulata	CESE
Celtis sinensis	CESI
Chionanthus retusa	CHR
Clerodendrum trichotomum	CLT
Cotoneaster acutifolia	COA
Corylus chinensis	COC
Cornus hemsleyi	COH
Corylus heterophylla	COHE
Cornus kousa	COK
Cornus poliophylla	COP
Cotoneaster silvestrii	COS
Cotoneaster submultiflorus	COSU
Cornus wilsoniana	COW
Cornus walreri	COWA
Crataegus cuneata	CRC
Crataegus hupehensis	CRH
Crataegus wilsonii	CRW
Deutzia parviflora	DEP
Diospyros lotus	DIL
Elaeagnus umbellata	ELU
Euonymus phellomanes	EP
Euonymus sangentianus	ES
Euonymus alatus	EUA
Euodia daniellii	EUD
Euptelea pleiosperma	EUP
Euonymus salicifolius	EUS
Euonymus verrucosoides	EUV
Evodia glabrifolia	EVG
Forsythia suspensa	FOS
Fraxinus bungeana	FRB
Fraxinus chinensis	FRC
Fraxinus mandschurica	FRM
Fraxinus paxiana	FRP
Fraxinus stylosa	FRS
Helwingia japonia	HEJ
Hovenia acerba	HOA
Kalopanax septemlobus	KAS
Koelreuteria paniculata	KOP
Lespedeza buergeri	LEB
Lespedeza formosa?	LEBU
Lindera glauca	LIG
Lindera obtusialoba	LIO
Lindera reflexa	LIR
Litsea tsinlingensis	LIT
Lonicera fragrantissima	LOF
Lonicera gynochlamydca	LOG
Lonicera hispida	LOH
Lonicera maackii	LOM
Lonicera serreana	LOS
Morus alba	MA
Malus baccata	MAB
Malus hupehensis	MAH
Maackia hwashanensis	MAHW
Magonlia biodii	MB
Meliosma cuneifolia	MEC
Meliosma flexuosa	MEF
Meliosma veitchiorum	MEV
Morus australi	MOA
Morus cathayana	MOC
Morus mongolica	MOM
Nelumbo lurea	NLU
Ostryopsis davidiana	OSD
Ostrya japonica	OSJ
Padus avium	PAA
Padus brachypoda	PAB
Padus obtusata	PAO
Paulownia tomentosa	PAT
Philadelphus incanus	PHI
Philadelphus pekinensis	PHP
Pinus armandi	PIA
Pinus tabulaeformis	PIT
Platycarya strobilacea	PLS
Populus davidiana	POD
Pyrus betulaefolia	PYB
Pyrus calleryana	PYC
Pyrus phaeocarpa	PYP
Quercus aliena var.acuteserrata	QUA
Quercus serrata	QUS
Quercus variabilis	QUV
Rhus chinensis	RHC
Rhamnus davurica	RHD
Rhododendron mariesii	RHM
Rhododendron micranthum	RHMI
Rhus potaninii	RHP
Rhododendron simsii	RHS
Rhus verniciflua	RHV
Ribes moupinense	RIM
Rosa bella	ROB
Rosa sertata	ROS
Rubus coreanus	RUC
Salix characta	SAC
Salix shihtsuanensis	SAS
Sambucus williamsii	SAW
Salix chaenomeloides	SC
Stachyurus chinensis subsp. latus	SCSL
Staphylea holocarpa	SH
Sorbus alnifoila	SOA
Sorbus folgneri	SOF
Sorbus hupehensis	SOH
Sorbaria kirilowii	SOK
Spiraea chinensis	SPC
Spiraea dasyantha	SPD
Spiraea sericea	SPS
Styrax hemsleyana	STH
Styrax japonia	STJ
Stewartia sinensis	STS
Symplocos paniclata	SYP
Tilia henryana var. subglabra?	TH
Tilia henryana	TIH
Tilia japonica	TIJ
Tilia mangolica	TIM
Tilia nobilis	TIN
Tilia oliveri	TIO
Tilia paucicostata	TIP
Toxicodendron sylvestre	TOS
Toona sinensis	TS
Ulmus lamellosa	UL
Ulmus bergmanniana	ULB
Ulmus davidiana	ULD
Ulmus macrocarpa	ULM
Viburnum betulifloium	VIB
Viburnum mongolicum	VIM
Zelkova sinica	ZES
